# Supplementary material for: Sex-specific disruption of murine midbrain astrocytic and dopaminergic developmental trajectories following antenatal GC treatment
Source: PubMed Central journal article supplement (PMC4884206; doi:10.1007/s00429-015-1049-0), 2015-05-06
Supplement: 429_2015_1049_MOESM1_ESM.pdf [file 429_2015_1049_MOESM1_ESM.pdf]

Electronic Supplementary Material

**Sex-specific disruption of murine midbrain astrocytic and dopaminergic developmental trajectories following antenatal GC treatment**

Simon McArthur<sup>1,2,3</sup>, Ilse S. Pienaar<sup>1,2</sup>, Sindhu M. Siddiqi<sup>1</sup>, Glenda E. Gillies<sup>1\*</sup>

1. Division of Experimental Medicine, Department of Medicine, Imperial College London, Hammersmith Hospital Campus, Du Cane Road, London W12 0NN
2. Joint first authorship
3. Current address: William Harvey Research Institute, Barts and The London School of Medicine and Dentistry, Charterhouse Square, London EC1 6BQ, UK

Address all correspondence and requests for reprints to:

\* Professor Glenda E. Gillies, Division of Experimental Medicine, Department of Medicine, Imperial College London, Hammersmith Campus, Du Cane Road, London W12 0NN; E-mail: [g.gillies@imperial.ac.uk](mailto:g.gillies@imperial.ac.uk); Telephone: (44)-020-7594 7050.

**Supplemental Table 1:** Results of global 3-way ANOVA for various parameters in the SNc

|                    | Parameter measured      | Source of variation     | F                 | p      |
|--------------------|-------------------------|-------------------------|-------------------|--------|
| SNc                | Nucleus volume          | Sex                     | $F_{1,80}=14.39$  | <0.001 |
|                    |                         | Level                   | $F_{3,80}=388.28$ | <0.001 |
|                    |                         | Treatment               | $F_{2,80}=0.38$   | 0.69   |
|                    |                         | Sex x Level             | $F_{3,80}=14.79$  | <0.001 |
|                    |                         | Sex x Treatment         | $F_{2,80}=9.79$   | 0.002  |
|                    |                         | Treatment x Level       | $F_{6,80}=17.11$  | <0.001 |
|                    |                         | Sex x Level x Treatment | $F_{6,80}=5.85$   | <0.001 |
|                    | GS-IR cell number       | Sex                     | $F_{1,80}=2.71$   | 0.106  |
|                    |                         | Level                   | $F_{3,80}=103.51$ | <0.001 |
|                    |                         | Treatment               | $F_{2,80}=43.78$  | <0.001 |
|                    |                         | Sex x Level             | $F_{3,80}=6.14$   | 0.001  |
|                    |                         | Sex x Treatment         | $F_{2,80}=7.25$   | 0.002  |
|                    |                         | Treatment x Level       | $F_{6,80}=8.42$   | <0.001 |
|                    |                         | Sex x Level x Treatment | $F_{6,80}=3.72$   | 0.004  |
|                    | TH-IR cell number       | Sex                     | $F_{1,80}=7.19$   | 0.009  |
|                    |                         | Level                   | $F_{3,80}=304.00$ | <0.001 |
|                    |                         | Treatment               | $F_{2,80}=1.39$   | 0.257  |
|                    |                         | Sex x Level             | $F_{3,80}=13.42$  | <0.001 |
|                    |                         | Sex x Treatment         | $F_{2,80}=13.54$  | <0.001 |
|                    |                         | Treatment x Level       | $F_{6,80}=14.32$  | <0.001 |
|                    |                         | Sex x Level x Treatment | $F_{6,80}=4.83$   | <0.001 |
|                    | TH-IR cell density      | Sex                     | $F_{1,80}=0.24$   | 0.628  |
|                    |                         | Level                   | $F_{3,80}=0.92$   | 0.439  |
|                    |                         | Treatment               | $F_{2,80}=0.71$   | 0.494  |
|                    |                         | Sex x Level             | $F_{3,80}=0.06$   | 0.980  |
|                    |                         | Sex x Treatment         | $F_{2,80}=1.03$   | 0.362  |
|                    |                         | Treatment x Level       | $F_{6,80}=0.92$   | 0.483  |
|                    |                         | Sex x Level x Treatment | $F_{6,80}=0.21$   | 0.972  |
| GS-IR cell density | Sex                     | $F_{1,80}=1.27$         | 0.264             |        |
|                    | Level                   | $F_{3,80}=1.77$         | 0.165             |        |
|                    | Treatment               | $F_{2,80}=30.81$        | <0.001            |        |
|                    | Sex x Level             | $F_{3,80}=0.53$         | 0.665             |        |
|                    | Sex x Treatment         | $F_{2,80}=0.50$         | 0.611             |        |
|                    | Treatment x Level       | $F_{6,80}=0.93$         | 0.482             |        |
|                    | Sex x Level x Treatment | $F_{6,80}=0.74$         | 0.622             |        |

Global three-way ANOVAs were performed for the substantia nigra pars compacta (SNc) to investigate the effects of antenatal glucocorticoid treatment compared with controls on the counts of cells immunoreactive for tyrosine hydroxylase (TH-IR) and glutamine synthetase (GS-IR), nucleus volumes, TH-IR and GS-IR cell distribution, and the TH-IR and GS-IR cell density.

**Supplemental Table 2:** Results of global 3-way ANOVA for various parameters in the VTA

|                         | Parameter measured | Source of variation     | F                | p      |
|-------------------------|--------------------|-------------------------|------------------|--------|
| VTA                     | Nucleus volume     | Sex                     | $F_{1,60}=2.96$  | 0.092  |
|                         |                    | Level                   | $F_{2,60}=97.27$ | <0.001 |
|                         |                    | Treatment               | $F_{2,60}=31.25$ | <0.001 |
|                         |                    | Sex x Level             | $F_{2,60}=27.97$ | <0.001 |
|                         |                    | Sex x Treatment         | $F_{2,60}=13.39$ | <0.001 |
|                         |                    | Treatment x Level       | $F_{4,60}=9.63$  | <0.001 |
|                         |                    | Sex x Level x Treatment | $F_{4,60}=20.20$ | <0.001 |
|                         | GS-IR cell number  | Sex                     | $F_{1,60}=0.12$  | 0.726  |
|                         |                    | Level                   | $F_{2,60}=11.84$ | <0.001 |
|                         |                    | Treatment               | $F_{2,60}=51.18$ | <0.001 |
|                         |                    | Sex x Level             | $F_{2,60}=10.27$ | <0.001 |
|                         |                    | Sex x Treatment         | $F_{2,60}=5.80$  | 0.006  |
|                         |                    | Treatment x Level       | $F_{4,60}=6.07$  | 0.001  |
|                         | TH-IR cell number  | Sex                     | $F_{1,60}=2.33$  | 0.134  |
|                         |                    | Level                   | $F_{2,60}=41.62$ | <0.001 |
|                         |                    | Treatment               | $F_{2,60}=13.85$ | <0.001 |
|                         |                    | Sex x Level             | $F_{2,60}=23.93$ | <0.001 |
|                         |                    | Sex x Treatment         | $F_{2,60}=11.60$ | <0.001 |
|                         |                    | Treatment x Level       | $F_{4,60}=11.53$ | <0.001 |
|                         |                    | Sex x Level x Treatment | $F_{4,60}=9.10$  | <0.001 |
|                         | TH-IR cell density | Sex                     | $F_{1,60}=0.005$ | 0.945  |
|                         |                    | Level                   | $F_{2,60}=0.151$ | 0.860  |
|                         |                    | Treatment               | $F_{2,60}=8.48$  | 0.001  |
|                         |                    | Sex x Level             | $F_{2,60}=3.06$  | 0.057  |
|                         |                    | Sex x Treatment         | $F_{2,60}=6.78$  | 0.003  |
|                         |                    | Treatment x Level       | $F_{4,60}=3.08$  | 0.025  |
|                         |                    | Sex x Level x Treatment | $F_{4,60}=4.86$  | 0.002  |
|                         | GS-IR cell density | Sex                     | $F_{1,60}=6.46$  | 0.015  |
| Level                   |                    | $F_{2,60}=0.94$         | 0.401            |        |
| Treatment               |                    | $F_{2,60}=72.70$        | <0.001           |        |
| Sex x Level             |                    | $F_{2,60}=6.92$         | 0.003            |        |
| Sex x Treatment         |                    | $F_{2,60}=0.22$         | 0.803            |        |
| Treatment x Level       |                    | $F_{4,60}=0.48$         | 0.753            |        |
| Sex x Level x Treatment |                    | $F_{4,60}=1.42$         | 0.246            |        |

Global three-way ANOVAs were performed for the ventral tegmental area (VTA) to investigate the effects of antenatal glucocorticoid treatment compared with controls on the counts of cells immunoreactive for tyrosine hydroxylase (TH-IR) and glutamine synthetase (GS-H), nucleus volumes, TH-IR and GS-IR cell distribution, and the TH-IR and GS-IR cell density.
